# Supplementary material for: Occupancy Modeling for Improved Accuracy and Understanding of Pathogen Prevalence and Dynamics
Source: PubMed Central journal article supplement (PMC4349882; doi:10.1371/journal.pone.0116605), 2015-03-04
Supplement: pone.0116605.s001.pdf [file pone.0116605.s001.pdf]

- 1 **Supporting information 1. R and WinBUGS code provided to replicate analysis.**
- 2 **The following is the base WinBUGS model used in analysis and R code for simulating**
- 3 **hypothetical pathogen detections.**
- 4
- 5

### Base WinBUGS code

```
model{
  for (i in 1:nfish) {
    logit(fish.psi0[i]) <- alpha0
    fish.psi[i] <- max(1.00000E-05, min(0.99999, fish.psi0[i]))
    lat.fish[i] ~ dbern(fish.psi[i])
    for (j in 1:no.orgs) {
      logit(organ.psi0[i, j]) <- beta[j]
      organ.psi[i, j]<-max(1.00000E-05,min(0.99999,organ.psi0[i,j]))*lat.fish[i]
      lat.org[i, j] ~ dbern(organ.psi[i, j])
      lat.org2[i, j] <- lat.org[i, j] + 1
      for (h in 1:3) {
        logit(theta[i, j, h, 2]) <- gamma[j]
        theta2[i, j, h, 1] <- 0.00000E+00
        theta2[i, j, h, 2] <- max(1.00000E-05, min(0.99999,theta[i, j, h, 2]))
        y[i, j, h] ~ dbin(theta2[i, j, h, lat.org2[i,
          j]], 1)
      }
    }
  }
  for (i in 1:nfish) {
    for (j in 1:no.orgs) {
      for (h in 1:3) {
        expected[i, j, h] <- theta2[i, j, h, lat.org2[i,j]]
        resid[i, j, h] <- y[i, j, h] - expected[i, j,h]
        residSquared[i, j, h] <- pow(resid[i, j, h],2)
        y.sim[i, j, h] ~ dbin(theta2[i, j, h, lat.org2[i,j]], 1)
        resid.sim[i, j, h] <- y.sim[i, j, h] - expected[i,j, h]
        residSquared.sim[i, j, h] <- pow(resid.sim[i,j, h], 2)
      }
    }
  }
}
```

```

    }
  }
  rss <- sum(residSquared[, , ])
  rss_sim <- sum(residSquared.sim[, , ])
  for (i in 1:5) {
    prev_org[i] <- sum(lat.org[, i])/nfish
  }
  prev <- sum(lat.fish[])/nfish
  logit(pred.fish) <- alpha0
  for (o in 1:5) {
    logit(pred_organ_psi[o]) <- beta[o]
    logit(pred_organ_p[o]) <- gamma[o]
  }
  alpha0 ~ dnorm(0.00000E+00, 0.37)
  beta0 ~ dnorm(0.00000E+00, 0.37)
  gamma0 ~ dnorm(0.00000E+00, 0.37)
  for (z in 1:no.orgs) {
    beta[z] ~ dnorm(beta0, beta.tau)
    gamma[z] ~ dnorm(gamma0, gamma.tau)
  }
  beta.tau <- pow(beta.ss, -2)
  beta.ss ~ dunif(0.00000E+00, 6)
  gamma.tau <- pow(gamma.ss, -2)
  gamma.ss ~ dunif(0.00000E+00, 6)
}

```

```

1
2 R code for simulating hypothetical pathogen detections
3 # FUNCTION TO SIMULATE DATA
4 sim_dat<- function(psi_fish,psi_organ,p_organ,n_fish,reps)
5   { # returns an array of 0 and 1 formatted for base model
6     psi_f<- psi_fish
7     psi_o<- psi_organ
8     p<- p_organ
9     n<- n_fish
10    reps<- reps
11    z_fish<- rbinom(n,1,psi_f)
12    z<- matrix(0, nrow=n, ncol=length(p))
13    for(i in 1:length(p))
14      {
15        z[,i]<- rbinom(n,1, psi_o[i]*z_fish)
16      }
17    y<- array(0,dim=c(n,length(psi_o),reps))
18    for(r in 1:reps)
19      {
20        for(organ in 1:length(psi_o))
21          {
22            y[,organ,r]<- rbinom(n,1,z[,organ]*p[organ])
23          }
24      }
25    out<-list(y=y,prev_true = mean(z_fish))
26    return(out)
27  }
28 # END FUNCTION
29
30 N<- seq(5,60,1)
31 norgs<- c(1,2,3,4,5)
32 psi_f<- seq(0.1, 0.9,0.1) #seq(0.1,0.9,0.1)
33 psi_o<- c(0.1, 0.5, 0.9) #seq(0.1,0.9,0.1)
34 p_o<- c(0.1, 0.5) # seq(0.1,0.9,0.1)
35 reps<- c(1:5)
36 out<- expand.grid(N=N,
37 norgs=norgs,psi_f=psi_f,reps=reps,psi_o=psi_o, p_o=p_o)
38 out$typeII<- 0
39
40 # DO SIMULATION FOR PARAMETER COMBINATIONS
41 for(i in 1:nrow(out))
42   {
43     yyy<- sapply(c(1:2000),function(x){
44       dat<- sim_dat(psi_fish=out$psi_f[i],
45         psi_organ=rep(out$psi_o[i], out$norgs[i]),

```

```
46     p_organ=rep(out$p_o[i], out$norms[i]),
47     n_fish = out$N[i],
48     reps=out$reps[i])
49     return(mean(dat$y))
50   })
51   out$typeII[i]<- mean(ifelse(yyy>0,1,0))
52 }
53
54
```

55 **S2. Analysis data** containing data used for analysis. The parasite codes are as follows:  
 56 *Apophallus*/echinostome: *Ae*, *Renibacter salmoninarum*: *Rs*, *Nanophyetus salmincola*: *Ns*,  
 57 *Parvicapsula minibicornis*: *Pm*  
 58

| id      | organ   | parasite | rep | pres |
|---------|---------|----------|-----|------|
| WH 26   | kid_glo | Pm       | 1   | 0    |
| WH21    | kid_glo | Pm       | 1   | 1    |
| WH 27   | kid_glo | Pm       | 1   | 1    |
| WH 24   | kid_glo | Pm       | 1   | 0    |
| WH 22   | kid_glo | Pm       | 1   | 0    |
| WH 440  | kid_glo | Pm       | 1   | 0    |
| WH 18   | kid_glo | Pm       | 1   | 1    |
| WH 19   | kid_glo | Pm       | 1   | 1    |
| WH 438  | kid_glo | Pm       | 1   | 1    |
| WH 29   | kid_glo | Pm       | 1   | 1    |
| WH 23   | kid_glo | Pm       | 1   | 1    |
| WH 28   | kid_glo | Pm       | 1   | 1    |
| WH 425  | kid_glo | Pm       | 1   | 1    |
| WH 31   | kid_glo | Pm       | 1   | 0    |
| WH 390  | kid_glo | Pm       | 1   | 0    |
| WH 381  | kid_glo | Pm       | 1   | 1    |
| WH 100  | kid_glo | Pm       | 1   | 1    |
| WH 107  | kid_glo | Pm       | 1   | 1    |
| WH 96F  | kid_glo | Pm       | 1   | 0    |
| WH F104 | kid_glo | Pm       | 1   | 1    |
| WH 25   | kid_glo | Pm       | 1   | 1    |
| WHF93   | kid_glo | Pm       | 1   | 0    |
| WH32    | kid_glo | Pm       | 1   | 0    |
| WH 429  | kid_glo | Pm       | 1   | 1    |
| WH 20   | kid_glo | Pm       | 1   | 1    |
| WH 26   | kid_tub | Pm       | 1   | 1    |
| WH21    | kid_tub | Pm       | 1   | 0    |
| WH 27   | kid_tub | Pm       | 1   | 1    |
| WH 24   | kid_tub | Pm       | 1   | 1    |
| WH 22   | kid_tub | Pm       | 1   | 1    |
| WH 440  | kid_tub | Pm       | 1   | 0    |
| WH 18   | kid_tub | Pm       | 1   | 0    |
| WH 19   | kid_tub | Pm       | 1   | 1    |
| WH 438  | kid_tub | Pm       | 1   | 0    |
| WH 29   | kid_tub | Pm       | 1   | 1    |
| WH 23   | kid_tub | Pm       | 1   | 1    |
| WH 28   | kid_tub | Pm       | 1   | 1    |
| WH 425  | kid_tub | Pm       | 1   | 1    |
| WH 31   | kid_tub | Pm       | 1   | 0    |

| id      | organ   | parasite | rep | pres |
|---------|---------|----------|-----|------|
| WH 390  | kid_tub | Pm       | 1   | 0    |
| WH 381  | kid_tub | Pm       | 1   | 1    |
| WH 100  | kid_tub | Pm       | 1   | 1    |
| WH 107  | kid_tub | Pm       | 1   | 1    |
| WH 96F  | kid_tub | Pm       | 1   | 1    |
| WH F104 | kid_tub | Pm       | 1   | 1    |
| WH 25   | kid_tub | Pm       | 1   | 1    |
| WHF93   | kid_tub | Pm       | 1   | 0    |
| WH32    | kid_tub | Pm       | 1   | 1    |
| WH 429  | kid_tub | Pm       | 1   | 0    |
| WH 20   | kid_tub | Pm       | 1   | 1    |
| WH 26   | gill    | AE       | 1   | 0    |
| WH21    | gill    | AE       | 1   | 0    |
| WH 27   | gill    | AE       | 1   | 1    |
| WH 24   | gill    | AE       | 1   | 0    |
| WH 22   | gill    | AE       | 1   | 0    |
| WH 440  | gill    | AE       | 1   | 0    |
| WH 18   | gill    | AE       | 1   | 0    |
| WH 19   | gill    | AE       | 1   | 0    |
| WH 438  | gill    | AE       | 1   | 0    |
| WH 29   | gill    | AE       | 1   | 0    |
| WH 23   | gill    | AE       | 1   | 0    |
| WH 28   | gill    | AE       | 1   | 0    |
| WH 425  | gill    | AE       | 1   | 0    |
| WH 31   | gill    | AE       | 1   | 0    |
| WH 390  | gill    | AE       | 1   | 0    |
| WH 381  | gill    | AE       | 1   | 0    |
| WH 100  | gill    | AE       | 1   | 0    |
| WH 107  | gill    | AE       | 1   | 0    |
| WH 96F  | gill    | AE       | 1   | 0    |
| WH F104 | gill    | AE       | 1   | 0    |
| WH 25   | gill    | AE       | 1   | 1    |
| WHF93   | gill    | AE       | 1   | 0    |
| WH32    | gill    | AE       | 1   | 0    |
| WH 429  | gill    | AE       | 1   | 0    |
| WH 20   | gill    | AE       | 1   | 0    |
| WH 26   | kid     | RS       | 1   | 0    |
| WH21    | kid     | RS       | 1   | 0    |
| WH 27   | kid     | RS       | 1   | 0    |
| WH 24   | kid     | RS       | 1   | 0    |
| WH 22   | kid     | RS       | 1   | 0    |
| WH 440  | kid     | RS       | 1   | 0    |
| WH 18   | kid     | RS       | 1   | 0    |

| id      | organ | parasite | rep | pres |
|---------|-------|----------|-----|------|
| WH 19   | kid   | RS       | 1   | 0    |
| WH 438  | kid   | RS       | 1   | 0    |
| WH 29   | kid   | RS       | 1   | 0    |
| WH 23   | kid   | RS       | 1   | 1    |
| WH 28   | kid   | RS       | 1   | 0    |
| WH 425  | kid   | RS       | 1   | 0    |
| WH 31   | kid   | RS       | 1   | 0    |
| WH 390  | kid   | RS       | 1   | 0    |
| WH 381  | kid   | RS       | 1   | 0    |
| WH 100  | kid   | RS       | 1   | 0    |
| WH 107  | kid   | RS       | 1   | 0    |
| WH 96F  | kid   | RS       | 1   | 0    |
| WH F104 | kid   | RS       | 1   | 0    |
| WH 25   | kid   | RS       | 1   | 0    |
| WHF93   | kid   | RS       | 1   | 0    |
| WH32    | kid   | RS       | 1   | 1    |
| WH 429  | kid   | RS       | 1   | 0    |
| WH 20   | kid   | RS       | 1   | 0    |
| WH 26   | liv   | RS       | 1   | 0    |
| WH21    | liv   | RS       | 1   | 0    |
| WH 27   | liv   | RS       | 1   | 0    |
| WH 24   | liv   | RS       | 1   | 0    |
| WH 22   | liv   | RS       | 1   | 0    |
| WH 440  | liv   | RS       | 1   | 0    |
| WH 18   | liv   | RS       | 1   | 0    |
| WH 19   | liv   | RS       | 1   | 0    |
| WH 438  | liv   | RS       | 1   | 0    |
| WH 29   | liv   | RS       | 1   | 0    |
| WH 23   | liv   | RS       | 1   | 0    |
| WH 28   | liv   | RS       | 1   | 0    |
| WH 425  | liv   | RS       | 1   | 0    |
| WH 31   | liv   | RS       | 1   | 0    |
| WH 390  | liv   | RS       | 1   | 0    |
| WH 381  | liv   | RS       | 1   | 0    |
| WH 100  | liv   | RS       | 1   | 1    |
| WH 107  | liv   | RS       | 1   | 0    |
| WH 96F  | liv   | RS       | 1   | 0    |
| WH F104 | liv   | RS       | 1   | 0    |
| WH 25   | liv   | RS       | 1   | 0    |
| WHF93   | liv   | RS       | 1   | 0    |
| WH32    | liv   | RS       | 1   | 0    |
| WH105   | liv   | RS       | 1   | 0    |
| WH 429  | liv   | RS       | 1   | 0    |

| id      | organ | parasite | rep | pres |
|---------|-------|----------|-----|------|
| WH 20   | liv   | RS       | 1   | 0    |
| WH 26   | spl   | RS       | 1   | 0    |
| WH21    | spl   | RS       | 1   | 0    |
| WH 27   | spl   | RS       | 1   | 0    |
| WH 24   | spl   | RS       | 1   | 0    |
| WH 22   | spl   | RS       | 1   | 0    |
| WH 440  | spl   | RS       | 1   | 0    |
| WH 18   | spl   | RS       | 1   | 0    |
| WH 19   | spl   | RS       | 1   | 0    |
| WH 438  | spl   | RS       | 1   | 0    |
| WH 29   | spl   | RS       | 1   | 0    |
| WH 23   | spl   | RS       | 1   | 0    |
| WH 28   | spl   | RS       | 1   | 0    |
| WH 425  | spl   | RS       | 1   | 0    |
| WH 31   | spl   | RS       | 1   | 0    |
| WH 390  | spl   | RS       | 1   | 0    |
| WH 381  | spl   | RS       | 1   | 0    |
| WH 100  | spl   | RS       | 1   | 0    |
| WH 107  | spl   | RS       | 1   | 0    |
| WH 96F  | spl   | RS       | 1   | 1    |
| WH F104 | spl   | RS       | 1   | 0    |
| WH 25   | spl   | RS       | 1   | 0    |
| WHF93   | spl   | RS       | 1   | 0    |
| WH32    | spl   | RS       | 1   | 0    |
| WH105   | spl   | RS       | 1   | 0    |
| WH 429  | spl   | RS       | 1   | 0    |
| WH 20   | spl   | RS       | 1   | 0    |
| WH 26   | gill  | Nano     | 1   | 0    |
| WH21    | gill  | Nano     | 1   | 1    |
| WH 27   | gill  | Nano     | 1   | 0    |
| WH 24   | gill  | Nano     | 1   | 1    |
| WH 22   | gill  | Nano     | 1   | 1    |
| WH 440  | gill  | Nano     | 1   | 1    |
| WH 18   | gill  | Nano     | 1   | 0    |
| WH 19   | gill  | Nano     | 1   | 1    |
| WH 29   | gill  | Nano     | 1   | 1    |
| WH 23   | gill  | Nano     | 1   | 1    |
| WH 28   | gill  | Nano     | 1   | 0    |
| WH 425  | gill  | Nano     | 1   | 1    |
| WH 31   | gill  | Nano     | 1   | 1    |
| WH 390  | gill  | Nano     | 1   | 1    |
| WH 381  | gill  | Nano     | 1   | 1    |
| WH 100  | gill  | Nano     | 1   | 1    |

| id      | organ | parasite | rep | pres |
|---------|-------|----------|-----|------|
| WH 107  | gill  | Nano     | 1   | 1    |
| WH 96F  | gill  | Nano     | 1   | 1    |
| WH F104 | gill  | Nano     | 1   | 1    |
| WH 25   | gill  | Nano     | 1   | 1    |
| WHF93   | gill  | Nano     | 1   | 1    |
| WH32    | gill  | Nano     | 1   | 1    |
| WH105   | gill  | Nano     | 1   | 1    |
| WH 429  | gill  | Nano     | 1   | 1    |
| WH 20   | gill  | Nano     | 1   | 1    |
| WH 26   | kid   | Nano     | 1   | 0    |
| WH21    | kid   | Nano     | 1   | 1    |
| WH 27   | kid   | Nano     | 1   | 1    |
| WH 24   | kid   | Nano     | 1   | 1    |
| WH 22   | kid   | Nano     | 1   | 1    |
| WH 440  | kid   | Nano     | 1   | 0    |
| WH 18   | kid   | Nano     | 1   | 1    |
| WH 19   | kid   | Nano     | 1   | 0    |
| WH 438  | kid   | Nano     | 1   | 1    |
| WH 29   | kid   | Nano     | 1   | 1    |
| WH 23   | kid   | Nano     | 1   | 1    |
| WH 28   | kid   | Nano     | 1   | 1    |
| WH 425  | kid   | Nano     | 1   | 1    |
| WH 31   | kid   | Nano     | 1   | 1    |
| WH 390  | kid   | Nano     | 1   | 1    |
| WH 381  | kid   | Nano     | 1   | 1    |
| WH 100  | kid   | Nano     | 1   | 1    |
| WH 107  | kid   | Nano     | 1   | 1    |
| WH 96F  | kid   | Nano     | 1   | 1    |
| WH F104 | kid   | Nano     | 1   | 1    |
| WH 25   | kid   | Nano     | 1   | 1    |
| WHF93   | kid   | Nano     | 1   | 1    |
| WH32    | kid   | Nano     | 1   | 1    |
| WH 429  | kid   | Nano     | 1   | 1    |
| WH 20   | kid   | Nano     | 1   | 1    |
| WH 26   | hrt   | Nano     | 1   | 1    |
| WH21    | hrt   | Nano     | 1   | 0    |
| WH 27   | hrt   | Nano     | 1   | 1    |
| WH 24   | hrt   | Nano     | 1   | 0    |
| WH 22   | hrt   | Nano     | 1   | 1    |
| WH 440  | hrt   | Nano     | 1   | 1    |
| WH 18   | hrt   | Nano     | 1   | 1    |
| WH 19   | hrt   | Nano     | 1   | 1    |
| WH 29   | hrt   | Nano     | 1   | 1    |

| id      | organ | parasite | rep | pres |
|---------|-------|----------|-----|------|
| WH 23   | hrt   | Nano     | 1   | 1    |
| WH 28   | hrt   | Nano     | 1   | 0    |
| WH 425  | hrt   | Nano     | 1   | 1    |
| WH 31   | hrt   | Nano     | 1   | 1    |
| WH 390  | hrt   | Nano     | 1   | 1    |
| WH 381  | hrt   | Nano     | 1   | 0    |
| WH 100  | hrt   | Nano     | 1   | 1    |
| WH 107  | hrt   | Nano     | 1   | 1    |
| WH 96F  | hrt   | Nano     | 1   | 1    |
| WH F104 | hrt   | Nano     | 1   | 1    |
| WH 25   | hrt   | Nano     | 1   | 1    |
| WHF93   | hrt   | Nano     | 1   | 1    |
| WH32    | hrt   | Nano     | 1   | 1    |
| WH105   | hrt   | Nano     | 1   | 1    |
| WH 429  | hrt   | Nano     | 1   | 0    |
| WH 20   | hrt   | Nano     | 1   | 1    |
| WH 26   | kid   | Furn     | 1   | 0    |
| WH21    | kid   | Furn     | 1   | 0    |
| WH 27   | kid   | Furn     | 1   | 0    |
| WH 24   | kid   | Furn     | 1   | 0    |
| WH 22   | kid   | Furn     | 1   | 0    |
| WH 440  | kid   | Furn     | 1   | 0    |
| WH 18   | kid   | Furn     | 1   | 0    |
| WH 19   | kid   | Furn     | 1   | 0    |
| WH 438  | kid   | Furn     | 1   | 0    |
| WH 29   | kid   | Furn     | 1   | 0    |
| WH 23   | kid   | Furn     | 1   | 0    |
| WH 28   | kid   | Furn     | 1   | 0    |
| WH 425  | kid   | Furn     | 1   | 0    |
| WH 31   | kid   | Furn     | 1   | 0    |
| WH 390  | kid   | Furn     | 1   | 0    |
| WH 381  | kid   | Furn     | 1   | 0    |
| WH 100  | kid   | Furn     | 1   | 0    |
| WH 107  | kid   | Furn     | 1   | 0    |
| WH 96F  | kid   | Furn     | 1   | 0    |
| WH F104 | kid   | Furn     | 1   | 0    |
| WH 25   | kid   | Furn     | 1   | 0    |
| WHF93   | kid   | Furn     | 1   | 0    |
| WH32    | kid   | Furn     | 1   | 0    |
| WH105   | kid   | Furn     | 1   | 0    |
| WH 429  | kid   | Furn     | 1   | 0    |
| WH 20   | kid   | Furn     | 1   | 0    |
| WH 26   | hrt   | Furn     | 1   | 0    |

| id      | organ | parasite | rep | pres |
|---------|-------|----------|-----|------|
| WH21    | hrt   | Furn     | 1   | 0    |
| WH 27   | hrt   | Furn     | 1   | 0    |
| WH 24   | hrt   | Furn     | 1   | 0    |
| WH 22   | hrt   | Furn     | 1   | 0    |
| WH 440  | hrt   | Furn     | 1   | 0    |
| WH 18   | hrt   | Furn     | 1   | 0    |
| WH 19   | hrt   | Furn     | 1   | 0    |
| WH 438  | hrt   | Furn     | 1   | 0    |
| WH 29   | hrt   | Furn     | 1   | 0    |
| WH 23   | hrt   | Furn     | 1   | 0    |
| WH 28   | hrt   | Furn     | 1   | 0    |
| WH 425  | hrt   | Furn     | 1   | 0    |
| WH 31   | hrt   | Furn     | 1   | 0    |
| WH 390  | hrt   | Furn     | 1   | 0    |
| WH 381  | hrt   | Furn     | 1   | 0    |
| WH 100  | hrt   | Furn     | 1   | 0    |
| WH 107  | hrt   | Furn     | 1   | 0    |
| WH 96F  | hrt   | Furn     | 1   | 0    |
| WH F104 | hrt   | Furn     | 1   | 0    |
| WH 25   | hrt   | Furn     | 1   | 0    |
| WHF93   | hrt   | Furn     | 1   | 0    |
| WH32    | hrt   | Furn     | 1   | 0    |
| WH105   | hrt   | Furn     | 1   | 0    |
| WH 429  | hrt   | Furn     | 1   | 0    |
| WH 20   | hrt   | Furn     | 1   | 0    |
| WH 26   | spl   | Furn     | 1   | 0    |
| WH21    | spl   | Furn     | 1   | 0    |
| WH 27   | spl   | Furn     | 1   | 0    |
| WH 24   | spl   | Furn     | 1   | 0    |
| WH 22   | spl   | Furn     | 1   | 0    |
| WH 440  | spl   | Furn     | 1   | 0    |
| WH 18   | spl   | Furn     | 1   | 0    |
| WH 19   | spl   | Furn     | 1   | 0    |
| WH 438  | spl   | Furn     | 1   | 0    |
| WH 29   | spl   | Furn     | 1   | 0    |
| WH 23   | spl   | Furn     | 1   | 0    |
| WH 28   | spl   | Furn     | 1   | 0    |
| WH 425  | spl   | Furn     | 1   | 0    |
| WH 31   | spl   | Furn     | 1   | 0    |
| WH 390  | spl   | Furn     | 1   | 0    |
| WH 381  | spl   | Furn     | 1   | 0    |
| WH 100  | spl   | Furn     | 1   | 0    |
| WH 107  | spl   | Furn     | 1   | 0    |

| id      | organ | parasite | rep | pres |
|---------|-------|----------|-----|------|
| WH 96F  | spl   | Furn     | 1   | 0    |
| WH F104 | spl   | Furn     | 1   | 0    |
| WH 25   | spl   | Furn     | 1   | 0    |
| WHF93   | spl   | Furn     | 1   | 0    |
| WH32    | spl   | Furn     | 1   | 0    |
| WH105   | spl   | Furn     | 1   | 0    |
| WH 429  | spl   | Furn     | 1   | 0    |
| WH 20   | spl   | Furn     | 1   | 0    |
| WH 26   | liv   | Furn     | 1   | 0    |
| WH21    | liv   | Furn     | 1   | 0    |
| WH 27   | liv   | Furn     | 1   | 0    |
| WH 24   | liv   | Furn     | 1   | 0    |
| WH 22   | liv   | Furn     | 1   | 0    |
| WH 440  | liv   | Furn     | 1   | 0    |
| WH 18   | liv   | Furn     | 1   | 0    |
| WH 19   | liv   | Furn     | 1   | 0    |
| WH 438  | liv   | Furn     | 1   | 0    |
| WH 29   | liv   | Furn     | 1   | 0    |
| WH 23   | liv   | Furn     | 1   | 0    |
| WH 28   | liv   | Furn     | 1   | 0    |
| WH 425  | liv   | Furn     | 1   | 0    |
| WH 31   | liv   | Furn     | 1   | 0    |
| WH 390  | liv   | Furn     | 1   | 0    |
| WH 381  | liv   | Furn     | 1   | 0    |
| WH 100  | liv   | Furn     | 1   | 0    |
| WH 107  | liv   | Furn     | 1   | 0    |
| WH 96F  | liv   | Furn     | 1   | 0    |
| WH F104 | liv   | Furn     | 1   | 0    |
| WH 25   | liv   | Furn     | 1   | 0    |
| WHF93   | liv   | Furn     | 1   | 0    |
| WH32    | liv   | Furn     | 1   | 0    |
| WH105   | liv   | Furn     | 1   | 0    |
| WH 429  | liv   | Furn     | 1   | 0    |
| WH 20   | liv   | Furn     | 1   | 0    |
| WH 26   | gill  | Furn     | 1   | 0    |
| WH21    | gill  | Furn     | 1   | 0    |
| WH 27   | gill  | Furn     | 1   | 0    |
| WH 24   | gill  | Furn     | 1   | 0    |
| WH 22   | gill  | Furn     | 1   | 0    |
| WH 440  | gill  | Furn     | 1   | 0    |
| WH 18   | gill  | Furn     | 1   | 0    |
| WH 19   | gill  | Furn     | 1   | 0    |
| WH 438  | gill  | Furn     | 1   | 0    |

| id      | organ   | parasite | rep | pres |
|---------|---------|----------|-----|------|
| WH 29   | gill    | Furn     | 1   | 0    |
| WH 23   | gill    | Furn     | 1   | 0    |
| WH 28   | gill    | Furn     | 1   | 0    |
| WH 425  | gill    | Furn     | 1   | 0    |
| WH 31   | gill    | Furn     | 1   | 0    |
| WH 390  | gill    | Furn     | 1   | 0    |
| WH 381  | gill    | Furn     | 1   | 0    |
| WH 100  | gill    | Furn     | 1   | 0    |
| WH 107  | gill    | Furn     | 1   | 0    |
| WH 96F  | gill    | Furn     | 1   | 0    |
| WH F104 | gill    | Furn     | 1   | 0    |
| WH 25   | gill    | Furn     | 1   | 0    |
| WHF93   | gill    | Furn     | 1   | 0    |
| WH32    | gill    | Furn     | 1   | 0    |
| WH105   | gill    | Furn     | 1   | 0    |
| WH 429  | gill    | Furn     | 1   | 0    |
| WH 20   | gill    | Furn     | 1   | 0    |
| WH 26   | kid_glo | Pm       | 2   | 1    |
| WH21    | kid_glo | Pm       | 2   | 1    |
| WH 27   | kid_glo | Pm       | 2   | 1    |
| WH 24   | kid_glo | Pm       | 2   | 1    |
| WH 22   | kid_glo | Pm       | 2   | 0    |
| WH 440  | kid_glo | Pm       | 2   | 1    |
| WH 18   | kid_glo | Pm       | 2   | 1    |
| WH 19   | kid_glo | Pm       | 2   | 1    |
| WH 438  | kid_glo | Pm       | 2   | 1    |
| WH 29   | kid_glo | Pm       | 2   | 1    |
| WH 23   | kid_glo | Pm       | 2   | 1    |
| WH 28   | kid_glo | Pm       | 2   | 1    |
| WH 425  | kid_glo | Pm       | 2   | 1    |
| WH 31   | kid_glo | Pm       | 2   | 1    |
| WH 390  | kid_glo | Pm       | 2   | 1    |
| WH 381  | kid_glo | Pm       | 2   | 0    |
| WH 100  | kid_glo | Pm       | 2   | 1    |
| WH 107  | kid_glo | Pm       | 2   | 1    |
| WH 96F  | kid_glo | Pm       | 2   | 0    |
| WH F104 | kid_glo | Pm       | 2   | 1    |
| WH 25   | kid_glo | Pm       | 2   | 1    |
| WHF93   | kid_glo | Pm       | 2   | 0    |
| WH32    | kid_glo | Pm       | 2   | 0    |
| WH105   | kid_glo | Pm       | 2   | 1    |
| WH 429  | kid_glo | Pm       | 2   | 1    |
| WH 20   | kid_glo | Pm       | 2   | 1    |

| id      | organ   | parasite | rep | pres |
|---------|---------|----------|-----|------|
| WH 26   | kid_tub | Pm       | 2   | 1    |
| WH21    | kid_tub | Pm       | 2   | 0    |
| WH 27   | kid_tub | Pm       | 2   | 1    |
| WH 24   | kid_tub | Pm       | 2   | 1    |
| WH 22   | kid_tub | Pm       | 2   | 1    |
| WH 440  | kid_tub | Pm       | 2   | 0    |
| WH 18   | kid_tub | Pm       | 2   | 1    |
| WH 19   | kid_tub | Pm       | 2   | 1    |
| WH 438  | kid_tub | Pm       | 2   | 0    |
| WH 29   | kid_tub | Pm       | 2   | 1    |
| WH 23   | kid_tub | Pm       | 2   | 1    |
| WH 28   | kid_tub | Pm       | 2   | 1    |
| WH 425  | kid_tub | Pm       | 2   | 1    |
| WH 31   | kid_tub | Pm       | 2   | 0    |
| WH 390  | kid_tub | Pm       | 2   | 0    |
| WH 381  | kid_tub | Pm       | 2   | 1    |
| WH 100  | kid_tub | Pm       | 2   | 1    |
| WH 107  | kid_tub | Pm       | 2   | 1    |
| WH 96F  | kid_tub | Pm       | 2   | 1    |
| WH F104 | kid_tub | Pm       | 2   | 1    |
| WH 25   | kid_tub | Pm       | 2   | 1    |
| WHF93   | kid_tub | Pm       | 2   | 0    |
| WH32    | kid_tub | Pm       | 2   | 1    |
| WH105   | kid_tub | Pm       | 2   | 1    |
| WH 429  | kid_tub | Pm       | 2   | 0    |
| WH 20   | kid_tub | Pm       | 2   | 1    |
| WH 26   | gill    | AE       | 2   | 1    |
| WH21    | gill    | AE       | 2   | 0    |
| WH 27   | gill    | AE       | 2   | 1    |
| WH 24   | gill    | AE       | 2   | 0    |
| WH 22   | gill    | AE       | 2   | 1    |
| WH 440  | gill    | AE       | 2   | 0    |
| WH 18   | gill    | AE       | 2   | 0    |
| WH 19   | gill    | AE       | 2   | 0    |
| WH 438  | gill    | AE       | 2   | 1    |
| WH 29   | gill    | AE       | 2   | 0    |
| WH 23   | gill    | AE       | 2   | 0    |
| WH 28   | gill    | AE       | 2   | 0    |
| WH 425  | gill    | AE       | 2   | 0    |
| WH 31   | gill    | AE       | 2   | 0    |
| WH 390  | gill    | AE       | 2   | 0    |
| WH 381  | gill    | AE       | 2   | 0    |
| WH 100  | gill    | AE       | 2   | 0    |

| id      | organ | parasite | rep | pres |
|---------|-------|----------|-----|------|
| WH 107  | gill  | AE       | 2   | 0    |
| WH 96F  | gill  | AE       | 2   | 0    |
| WH F104 | gill  | AE       | 2   | 0    |
| WH 25   | gill  | AE       | 2   | 1    |
| WHF93   | gill  | AE       | 2   | 0    |
| WH32    | gill  | AE       | 2   | 0    |
| WH105   | gill  | AE       | 2   | 1    |
| WH 429  | gill  | AE       | 2   | 0    |
| WH 20   | gill  | AE       | 2   | 1    |
| WH 26   | kid   | RS       | 2   | 0    |
| WH21    | kid   | RS       | 2   | 0    |
| WH 27   | kid   | RS       | 2   | 0    |
| WH 24   | kid   | RS       | 2   | 0    |
| WH 22   | kid   | RS       | 2   | 0    |
| WH 440  | kid   | RS       | 2   | 0    |
| WH 18   | kid   | RS       | 2   | 0    |
| WH 19   | kid   | RS       | 2   | 0    |
| WH 438  | kid   | RS       | 2   | 0    |
| WH 29   | kid   | RS       | 2   | 0    |
| WH 23   | kid   | RS       | 2   | 0    |
| WH 28   | kid   | RS       | 2   | 0    |
| WH 425  | kid   | RS       | 2   | 0    |
| WH 31   | kid   | RS       | 2   | 0    |
| WH 390  | kid   | RS       | 2   | 0    |
| WH 381  | kid   | RS       | 2   | 0    |
| WH 100  | kid   | RS       | 2   | 0    |
| WH 107  | kid   | RS       | 2   | 0    |
| WH 96F  | kid   | RS       | 2   | 0    |
| WH F104 | kid   | RS       | 2   | 0    |
| WH 25   | kid   | RS       | 2   | 0    |
| WHF93   | kid   | RS       | 2   | 0    |
| WH32    | kid   | RS       | 2   | 1    |
| WH105   | kid   | RS       | 2   | 1    |
| WH 429  | kid   | RS       | 2   | 0    |
| WH 20   | kid   | RS       | 2   | 0    |
| WH 26   | liv   | RS       | 2   | 0    |
| WH21    | liv   | RS       | 2   | 0    |
| WH 27   | liv   | RS       | 2   | 0    |
| WH 24   | liv   | RS       | 2   | 0    |
| WH 22   | liv   | RS       | 2   | 0    |
| WH 440  | liv   | RS       | 2   | 0    |
| WH 18   | liv   | RS       | 2   | 0    |
| WH 19   | liv   | RS       | 2   | 0    |

| id      | organ | parasite | rep | pres |
|---------|-------|----------|-----|------|
| WH 438  | liv   | RS       | 2   | 0    |
| WH 29   | liv   | RS       | 2   | 0    |
| WH 23   | liv   | RS       | 2   | 0    |
| WH 28   | liv   | RS       | 2   | 0    |
| WH 425  | liv   | RS       | 2   | 0    |
| WH 31   | liv   | RS       | 2   | 0    |
| WH 390  | liv   | RS       | 2   | 0    |
| WH 381  | liv   | RS       | 2   | 0    |
| WH 100  | liv   | RS       | 2   | 0    |
| WH 107  | liv   | RS       | 2   | 0    |
| WH 96F  | liv   | RS       | 2   | 0    |
| WH F104 | liv   | RS       | 2   | 0    |
| WH 25   | liv   | RS       | 2   | 0    |
| WHF93   | liv   | RS       | 2   | 0    |
| WH32    | liv   | RS       | 2   | 0    |
| WH105   | liv   | RS       | 2   | 0    |
| WH 20   | liv   | RS       | 2   | 0    |
| WH 26   | spl   | RS       | 2   | 0    |
| WH21    | spl   | RS       | 2   | 0    |
| WH 27   | spl   | RS       | 2   | 0    |
| WH 24   | spl   | RS       | 2   | 0    |
| WH 22   | spl   | RS       | 2   | 0    |
| WH 440  | spl   | RS       | 2   | 0    |
| WH 18   | spl   | RS       | 2   | 0    |
| WH 19   | spl   | RS       | 2   | 0    |
| WH 438  | spl   | RS       | 2   | 0    |
| WH 29   | spl   | RS       | 2   | 0    |
| WH 23   | spl   | RS       | 2   | 0    |
| WH 28   | spl   | RS       | 2   | 0    |
| WH 425  | spl   | RS       | 2   | 0    |
| WH 31   | spl   | RS       | 2   | 0    |
| WH 390  | spl   | RS       | 2   | 0    |
| WH 381  | spl   | RS       | 2   | 0    |
| WH 100  | spl   | RS       | 2   | 0    |
| WH 107  | spl   | RS       | 2   | 0    |
| WH 96F  | spl   | RS       | 2   | 0    |
| WH F104 | spl   | RS       | 2   | 0    |
| WH 25   | spl   | RS       | 2   | 0    |
| WHF93   | spl   | RS       | 2   | 0    |
| WH32    | spl   | RS       | 2   | 0    |
| WH105   | spl   | RS       | 2   | 0    |
| WH 20   | spl   | RS       | 2   | 0    |
| WH 26   | gill  | Nano     | 2   | 0    |

| id      | organ | parasite | rep | pres |
|---------|-------|----------|-----|------|
| WH21    | gill  | Nano     | 2   | 0    |
| WH 27   | gill  | Nano     | 2   | 0    |
| WH 24   | gill  | Nano     | 2   | 1    |
| WH 22   | gill  | Nano     | 2   | 0    |
| WH 440  | gill  | Nano     | 2   | 1    |
| WH 18   | gill  | Nano     | 2   | 1    |
| WH 19   | gill  | Nano     | 2   | 1    |
| WH 438  | gill  | Nano     | 2   | 1    |
| WH 29   | gill  | Nano     | 2   | 1    |
| WH 23   | gill  | Nano     | 2   | 1    |
| WH 28   | gill  | Nano     | 2   | 1    |
| WH 425  | gill  | Nano     | 2   | 1    |
| WH 31   | gill  | Nano     | 2   | 1    |
| WH 390  | gill  | Nano     | 2   | 1    |
| WH 381  | gill  | Nano     | 2   | 1    |
| WH 100  | gill  | Nano     | 2   | 1    |
| WH 107  | gill  | Nano     | 2   | 1    |
| WH 96F  | gill  | Nano     | 2   | 1    |
| WH F104 | gill  | Nano     | 2   | 1    |
| WH 25   | gill  | Nano     | 2   | 1    |
| WHF93   | gill  | Nano     | 2   | 1    |
| WH32    | gill  | Nano     | 2   | 1    |
| WH105   | gill  | Nano     | 2   | 1    |
| WH 429  | gill  | Nano     | 2   | 1    |
| WH 20   | gill  | Nano     | 2   | 1    |
| WH 26   | kid   | Nano     | 2   | 1    |
| WH21    | kid   | Nano     | 2   | 0    |
| WH 27   | kid   | Nano     | 2   | 1    |
| WH 24   | kid   | Nano     | 2   | 1    |
| WH 22   | kid   | Nano     | 2   | 1    |
| WH 440  | kid   | Nano     | 2   | 0    |
| WH 18   | kid   | Nano     | 2   | 0    |
| WH 19   | kid   | Nano     | 2   | 0    |
| WH 438  | kid   | Nano     | 2   | 0    |
| WH 29   | kid   | Nano     | 2   | 1    |
| WH 23   | kid   | Nano     | 2   | 1    |
| WH 28   | kid   | Nano     | 2   | 1    |
| WH 425  | kid   | Nano     | 2   | 1    |
| WH 31   | kid   | Nano     | 2   | 1    |
| WH 390  | kid   | Nano     | 2   | 0    |
| WH 381  | kid   | Nano     | 2   | 1    |
| WH 100  | kid   | Nano     | 2   | 1    |
| WH 107  | kid   | Nano     | 2   | 1    |

| id      | organ | parasite | rep | pres |
|---------|-------|----------|-----|------|
| WH 96F  | kid   | Nano     | 2   | 1    |
| WH F104 | kid   | Nano     | 2   | 1    |
| WH 25   | kid   | Nano     | 2   | 1    |
| WHF93   | kid   | Nano     | 2   | 1    |
| WH32    | kid   | Nano     | 2   | 1    |
| WH105   | kid   | Nano     | 2   | 1    |
| WH 429  | kid   | Nano     | 2   | 1    |
| WH 20   | kid   | Nano     | 2   | 0    |
| WH 26   | hrt   | Nano     | 2   | 1    |
| WH21    | hrt   | Nano     | 2   | 1    |
| WH 24   | hrt   | Nano     | 2   | 0    |
| WH 22   | hrt   | Nano     | 2   | 1    |
| WH 18   | hrt   | Nano     | 2   | 1    |
| WH 31   | hrt   | Nano     | 2   | 1    |
| WH 390  | hrt   | Nano     | 2   | 1    |
| WH 381  | hrt   | Nano     | 2   | 1    |
| WH 100  | hrt   | Nano     | 2   | 1    |
| WH 107  | hrt   | Nano     | 2   | 1    |
| WH 96F  | hrt   | Nano     | 2   | 1    |
| WH F104 | hrt   | Nano     | 2   | 1    |
| WH 25   | hrt   | Nano     | 2   | 1    |
| WHF93   | hrt   | Nano     | 2   | 1    |
| WH32    | hrt   | Nano     | 2   | 0    |
| WH 20   | hrt   | Nano     | 2   | 0    |
| WH 26   | kid   | Furn     | 2   | 0    |
| WH21    | kid   | Furn     | 2   | 0    |
| WH 27   | kid   | Furn     | 2   | 0    |
| WH 24   | kid   | Furn     | 2   | 0    |
| WH 22   | kid   | Furn     | 2   | 0    |
| WH 440  | kid   | Furn     | 2   | 0    |
| WH 18   | kid   | Furn     | 2   | 0    |
| WH 19   | kid   | Furn     | 2   | 0    |
| WH 438  | kid   | Furn     | 2   | 0    |
| WH 29   | kid   | Furn     | 2   | 0    |
| WH 23   | kid   | Furn     | 2   | 0    |
| WH 28   | kid   | Furn     | 2   | 0    |
| WH 425  | kid   | Furn     | 2   | 0    |
| WH 31   | kid   | Furn     | 2   | 0    |
| WH 390  | kid   | Furn     | 2   | 0    |
| WH 381  | kid   | Furn     | 2   | 0    |
| WH 100  | kid   | Furn     | 2   | 0    |
| WH 107  | kid   | Furn     | 2   | 0    |
| WH 96F  | kid   | Furn     | 2   | 0    |

| id      | organ | parasite | rep | pres |
|---------|-------|----------|-----|------|
| WH F104 | kid   | Furn     | 2   | 0    |
| WH 25   | kid   | Furn     | 2   | 0    |
| WHF93   | kid   | Furn     | 2   | 0    |
| WH32    | kid   | Furn     | 2   | 0    |
| WH105   | kid   | Furn     | 2   | 0    |
| WH 429  | kid   | Furn     | 2   | 0    |
| WH 20   | kid   | Furn     | 2   | 0    |
| WH 26   | hrt   | Furn     | 2   | 0    |
| WH21    | hrt   | Furn     | 2   | 0    |
| WH 27   | hrt   | Furn     | 2   | 0    |
| WH 24   | hrt   | Furn     | 2   | 0    |
| WH 22   | hrt   | Furn     | 2   | 0    |
| WH 440  | hrt   | Furn     | 2   | 0    |
| WH 18   | hrt   | Furn     | 2   | 0    |
| WH 19   | hrt   | Furn     | 2   | 0    |
| WH 438  | hrt   | Furn     | 2   | 0    |
| WH 29   | hrt   | Furn     | 2   | 0    |
| WH 23   | hrt   | Furn     | 2   | 0    |
| WH 28   | hrt   | Furn     | 2   | 0    |
| WH 425  | hrt   | Furn     | 2   | 0    |
| WH 31   | hrt   | Furn     | 2   | 0    |
| WH 390  | hrt   | Furn     | 2   | 0    |
| WH 381  | hrt   | Furn     | 2   | 0    |
| WH 100  | hrt   | Furn     | 2   | 0    |
| WH 107  | hrt   | Furn     | 2   | 0    |
| WH 96F  | hrt   | Furn     | 2   | 0    |
| WH F104 | hrt   | Furn     | 2   | 0    |
| WH 25   | hrt   | Furn     | 2   | 0    |
| WHF93   | hrt   | Furn     | 2   | 0    |
| WH32    | hrt   | Furn     | 2   | 0    |
| WH105   | hrt   | Furn     | 2   | 0    |
| WH 429  | hrt   | Furn     | 2   | 0    |
| WH 20   | hrt   | Furn     | 2   | 0    |
| WH 26   | spl   | Furn     | 2   | 0    |
| WH21    | spl   | Furn     | 2   | 0    |
| WH 27   | spl   | Furn     | 2   | 0    |
| WH 24   | spl   | Furn     | 2   | 0    |
| WH 22   | spl   | Furn     | 2   | 0    |
| WH 440  | spl   | Furn     | 2   | 0    |
| WH 18   | spl   | Furn     | 2   | 0    |
| WH 19   | spl   | Furn     | 2   | 0    |
| WH 438  | spl   | Furn     | 2   | 0    |
| WH 29   | spl   | Furn     | 2   | 0    |

| id      | organ | parasite | rep | pres |
|---------|-------|----------|-----|------|
| WH 23   | spl   | Furn     | 2   | 0    |
| WH 28   | spl   | Furn     | 2   | 0    |
| WH 425  | spl   | Furn     | 2   | 0    |
| WH 31   | spl   | Furn     | 2   | 0    |
| WH 390  | spl   | Furn     | 2   | 0    |
| WH 381  | spl   | Furn     | 2   | 0    |
| WH 100  | spl   | Furn     | 2   | 0    |
| WH 107  | spl   | Furn     | 2   | 0    |
| WH 96F  | spl   | Furn     | 2   | 0    |
| WH F104 | spl   | Furn     | 2   | 0    |
| WH 25   | spl   | Furn     | 2   | 0    |
| WHF93   | spl   | Furn     | 2   | 0    |
| WH32    | spl   | Furn     | 2   | 0    |
| WH105   | spl   | Furn     | 2   | 0    |
| WH 429  | spl   | Furn     | 2   | 0    |
| WH 20   | spl   | Furn     | 2   | 0    |
| WH 26   | liv   | Furn     | 2   | 0    |
| WH21    | liv   | Furn     | 2   | 0    |
| WH 27   | liv   | Furn     | 2   | 0    |
| WH 24   | liv   | Furn     | 2   | 0    |
| WH 22   | liv   | Furn     | 2   | 0    |
| WH 440  | liv   | Furn     | 2   | 0    |
| WH 18   | liv   | Furn     | 2   | 0    |
| WH 19   | liv   | Furn     | 2   | 0    |
| WH 438  | liv   | Furn     | 2   | 0    |
| WH 29   | liv   | Furn     | 2   | 0    |
| WH 23   | liv   | Furn     | 2   | 0    |
| WH 28   | liv   | Furn     | 2   | 0    |
| WH 425  | liv   | Furn     | 2   | 0    |
| WH 31   | liv   | Furn     | 2   | 0    |
| WH 390  | liv   | Furn     | 2   | 0    |
| WH 381  | liv   | Furn     | 2   | 0    |
| WH 100  | liv   | Furn     | 2   | 0    |
| WH 107  | liv   | Furn     | 2   | 0    |
| WH 96F  | liv   | Furn     | 2   | 0    |
| WH F104 | liv   | Furn     | 2   | 0    |
| WH 25   | liv   | Furn     | 2   | 0    |
| WHF93   | liv   | Furn     | 2   | 0    |
| WH32    | liv   | Furn     | 2   | 0    |
| WH105   | liv   | Furn     | 2   | 0    |
| WH 429  | liv   | Furn     | 2   | 0    |
| WH 20   | liv   | Furn     | 2   | 0    |
| WH 26   | gill  | Furn     | 2   | 0    |

| id      | organ   | parasite | rep | pres |
|---------|---------|----------|-----|------|
| WH21    | gill    | Furn     | 2   | 0    |
| WH 27   | gill    | Furn     | 2   | 0    |
| WH 24   | gill    | Furn     | 2   | 0    |
| WH 22   | gill    | Furn     | 2   | 0    |
| WH 440  | gill    | Furn     | 2   | 0    |
| WH 18   | gill    | Furn     | 2   | 0    |
| WH 19   | gill    | Furn     | 2   | 0    |
| WH 438  | gill    | Furn     | 2   | 0    |
| WH 29   | gill    | Furn     | 2   | 0    |
| WH 23   | gill    | Furn     | 2   | 0    |
| WH 28   | gill    | Furn     | 2   | 0    |
| WH 425  | gill    | Furn     | 2   | 0    |
| WH 31   | gill    | Furn     | 2   | 0    |
| WH 390  | gill    | Furn     | 2   | 0    |
| WH 381  | gill    | Furn     | 2   | 0    |
| WH 100  | gill    | Furn     | 2   | 0    |
| WH 107  | gill    | Furn     | 2   | 0    |
| WH 96F  | gill    | Furn     | 2   | 0    |
| WH F104 | gill    | Furn     | 2   | 0    |
| WH 25   | gill    | Furn     | 2   | 0    |
| WHF93   | gill    | Furn     | 2   | 0    |
| WH32    | gill    | Furn     | 2   | 0    |
| WH105   | gill    | Furn     | 2   | 0    |
| WH 429  | gill    | Furn     | 2   | 0    |
| WH 20   | gill    | Furn     | 2   | 0    |
| WH 26   | kid_glo | Pm       | 3   | 1    |
| WH21    | kid_glo | Pm       | 3   | 1    |
| WH 27   | kid_glo | Pm       | 3   | 1    |
| WH 24   | kid_glo | Pm       | 3   | 1    |
| WH 22   | kid_glo | Pm       | 3   | 0    |
| WH 440  | kid_glo | Pm       | 3   | 1    |
| WH 18   | kid_glo | Pm       | 3   | 1    |
| WH 19   | kid_glo | Pm       | 3   | 1    |
| WH 438  | kid_glo | Pm       | 3   | 1    |
| WH 29   | kid_glo | Pm       | 3   | 1    |
| WH 23   | kid_glo | Pm       | 3   | 1    |
| WH 28   | kid_glo | Pm       | 3   | 1    |
| WH 425  | kid_glo | Pm       | 3   | 1    |
| WH 31   | kid_glo | Pm       | 3   | 1    |
| WH 390  | kid_glo | Pm       | 3   | 0    |
| WH 381  | kid_glo | Pm       | 3   | 1    |
| WH 100  | kid_glo | Pm       | 3   | 1    |
| WH 107  | kid_glo | Pm       | 3   | 0    |

| id      | organ   | parasite | rep | pres |
|---------|---------|----------|-----|------|
| WH 96F  | kid_glo | Pm       | 3   | 1    |
| WH F104 | kid_glo | Pm       | 3   | 1    |
| WH 25   | kid_glo | Pm       | 3   | 0    |
| WHF93   | kid_glo | Pm       | 3   | 0    |
| WH32    | kid_glo | Pm       | 3   | 1    |
| WH105   | kid_glo | Pm       | 3   | 1    |
| WH 20   | kid_glo | Pm       | 3   | 1    |
| WH 26   | kid_tub | Pm       | 3   | 1    |
| WH21    | kid_tub | Pm       | 3   | 0    |
| WH 27   | kid_tub | Pm       | 3   | 1    |
| WH 24   | kid_tub | Pm       | 3   | 1    |
| WH 22   | kid_tub | Pm       | 3   | 1    |
| WH 440  | kid_tub | Pm       | 3   | 0    |
| WH 18   | kid_tub | Pm       | 3   | 1    |
| WH 19   | kid_tub | Pm       | 3   | 1    |
| WH 438  | kid_tub | Pm       | 3   | 1    |
| WH 29   | kid_tub | Pm       | 3   | 1    |
| WH 23   | kid_tub | Pm       | 3   | 1    |
| WH 28   | kid_tub | Pm       | 3   | 1    |
| WH 425  | kid_tub | Pm       | 3   | 1    |
| WH 31   | kid_tub | Pm       | 3   | 0    |
| WH 390  | kid_tub | Pm       | 3   | 1    |
| WH 381  | kid_tub | Pm       | 3   | 1    |
| WH 100  | kid_tub | Pm       | 3   | 1    |
| WH 107  | kid_tub | Pm       | 3   | 1    |
| WH 96F  | kid_tub | Pm       | 3   | 1    |
| WH F104 | kid_tub | Pm       | 3   | 1    |
| WH 25   | kid_tub | Pm       | 3   | 0    |
| WHF93   | kid_tub | Pm       | 3   | 1    |
| WH32    | kid_tub | Pm       | 3   | 1    |
| WH105   | kid_tub | Pm       | 3   | 0    |
| WH 20   | kid_tub | Pm       | 3   | 1    |
| WH 26   | gill    | AE       | 3   | 0    |
| WH21    | gill    | AE       | 3   | 0    |
| WH 27   | gill    | AE       | 3   | 1    |
| WH 24   | gill    | AE       | 3   | 0    |
| WH 22   | gill    | AE       | 3   | 0    |
| WH 440  | gill    | AE       | 3   | 0    |
| WH 18   | gill    | AE       | 3   | 0    |
| WH 19   | gill    | AE       | 3   | 0    |
| WH 438  | gill    | AE       | 3   | 1    |
| WH 29   | gill    | AE       | 3   | 1    |
| WH 23   | gill    | AE       | 3   | 0    |

| id      | organ | parasite | rep | pres |
|---------|-------|----------|-----|------|
| WH 28   | gill  | AE       | 3   | 0    |
| WH 425  | gill  | AE       | 3   | 1    |
| WH 31   | gill  | AE       | 3   | 0    |
| WH 390  | gill  | AE       | 3   | 0    |
| WH 381  | gill  | AE       | 3   | 0    |
| WH 100  | gill  | AE       | 3   | 0    |
| WH 107  | gill  | AE       | 3   | 0    |
| WH 96F  | gill  | AE       | 3   | 0    |
| WH F104 | gill  | AE       | 3   | 0    |
| WH 25   | gill  | AE       | 3   | 1    |
| WHF93   | gill  | AE       | 3   | 0    |
| WH32    | gill  | AE       | 3   | 0    |
| WH105   | gill  | AE       | 3   | 1    |
| WH 429  | gill  | AE       | 3   | 0    |
| WH 20   | gill  | AE       | 3   | 1    |
| WH 26   | kid   | RS       | 3   | 0    |
| WH21    | kid   | RS       | 3   | 0    |
| WH 27   | kid   | RS       | 3   | 0    |
| WH 24   | kid   | RS       | 3   | 0    |
| WH 22   | kid   | RS       | 3   | 0    |
| WH 440  | kid   | RS       | 3   | 0    |
| WH 18   | kid   | RS       | 3   | 0    |
| WH 19   | kid   | RS       | 3   | 0    |
| WH 438  | kid   | RS       | 3   | 0    |
| WH 29   | kid   | RS       | 3   | 0    |
| WH 23   | kid   | RS       | 3   | 0    |
| WH 28   | kid   | RS       | 3   | 0    |
| WH 425  | kid   | RS       | 3   | 0    |
| WH 31   | kid   | RS       | 3   | 0    |
| WH 390  | kid   | RS       | 3   | 0    |
| WH 381  | kid   | RS       | 3   | 0    |
| WH 100  | kid   | RS       | 3   | 0    |
| WH 107  | kid   | RS       | 3   | 0    |
| WH 96F  | kid   | RS       | 3   | 0    |
| WH F104 | kid   | RS       | 3   | 0    |
| WH 25   | kid   | RS       | 3   | 0    |
| WHF93   | kid   | RS       | 3   | 0    |
| WH32    | kid   | RS       | 3   | 1    |
| WH105   | kid   | RS       | 3   | 1    |
| WH 429  | kid   | RS       | 3   | 0    |
| WH 20   | kid   | RS       | 3   | 0    |
| WH 26   | liv   | RS       | 3   | 0    |
| WH21    | liv   | RS       | 3   | 0    |

| id      | organ | parasite | rep | pres |
|---------|-------|----------|-----|------|
| WH 27   | liv   | RS       | 3   | 0    |
| WH 24   | liv   | RS       | 3   | 0    |
| WH 22   | liv   | RS       | 3   | 0    |
| WH 440  | liv   | RS       | 3   | 0    |
| WH 18   | liv   | RS       | 3   | 0    |
| WH 19   | liv   | RS       | 3   | 0    |
| WH 438  | liv   | RS       | 3   | 0    |
| WH 29   | liv   | RS       | 3   | 0    |
| WH 23   | liv   | RS       | 3   | 0    |
| WH 28   | liv   | RS       | 3   | 0    |
| WH 425  | liv   | RS       | 3   | 0    |
| WH 31   | liv   | RS       | 3   | 0    |
| WH 390  | liv   | RS       | 3   | 0    |
| WH 381  | liv   | RS       | 3   | 0    |
| WH 100  | liv   | RS       | 3   | 0    |
| WH 107  | liv   | RS       | 3   | 0    |
| WH 96F  | liv   | RS       | 3   | 0    |
| WH F104 | liv   | RS       | 3   | 0    |
| WH 25   | liv   | RS       | 3   | 0    |
| WHF93   | liv   | RS       | 3   | 0    |
| WH32    | liv   | RS       | 3   | 0    |
| WH105   | liv   | RS       | 3   | 0    |
| WH 20   | liv   | RS       | 3   | 0    |
| WH 26   | spl   | RS       | 3   | 0    |
| WH21    | spl   | RS       | 3   | 0    |
| WH 27   | spl   | RS       | 3   | 0    |
| WH 24   | spl   | RS       | 3   | 0    |
| WH 22   | spl   | RS       | 3   | 0    |
| WH 440  | spl   | RS       | 3   | 0    |
| WH 18   | spl   | RS       | 3   | 0    |
| WH 19   | spl   | RS       | 3   | 0    |
| WH 438  | spl   | RS       | 3   | 0    |
| WH 29   | spl   | RS       | 3   | 0    |
| WH 23   | spl   | RS       | 3   | 0    |
| WH 28   | spl   | RS       | 3   | 0    |
| WH 425  | spl   | RS       | 3   | 0    |
| WH 31   | spl   | RS       | 3   | 0    |
| WH 390  | spl   | RS       | 3   | 0    |
| WH 381  | spl   | RS       | 3   | 0    |
| WH 100  | spl   | RS       | 3   | 0    |
| WH 107  | spl   | RS       | 3   | 0    |
| WH 96F  | spl   | RS       | 3   | 0    |
| WH F104 | spl   | RS       | 3   | 0    |

| id      | organ | parasite | rep | pres |
|---------|-------|----------|-----|------|
| WH 25   | spl   | RS       | 3   | 0    |
| WHF93   | spl   | RS       | 3   | 0    |
| WH32    | spl   | RS       | 3   | 0    |
| WH105   | spl   | RS       | 3   | 0    |
| WH 20   | spl   | RS       | 3   | 0    |
| WH 26   | gill  | Nano     | 3   | 1    |
| WH21    | gill  | Nano     | 3   | 0    |
| WH 27   | gill  | Nano     | 3   | 1    |
| WH 24   | gill  | Nano     | 3   | 1    |
| WH 22   | gill  | Nano     | 3   | 1    |
| WH 440  | gill  | Nano     | 3   | 1    |
| WH 18   | gill  | Nano     | 3   | 1    |
| WH 19   | gill  | Nano     | 3   | 1    |
| WH 438  | gill  | Nano     | 3   | 1    |
| WH 29   | gill  | Nano     | 3   | 1    |
| WH 23   | gill  | Nano     | 3   | 0    |
| WH 28   | gill  | Nano     | 3   | 1    |
| WH 425  | gill  | Nano     | 3   | 1    |
| WH 31   | gill  | Nano     | 3   | 0    |
| WH 390  | gill  | Nano     | 3   | 1    |
| WH 381  | gill  | Nano     | 3   | 1    |
| WH 100  | gill  | Nano     | 3   | 1    |
| WH 107  | gill  | Nano     | 3   | 1    |
| WH 96F  | gill  | Nano     | 3   | 1    |
| WH F104 | gill  | Nano     | 3   | 1    |
| WH 25   | gill  | Nano     | 3   | 1    |
| WHF93   | gill  | Nano     | 3   | 1    |
| WH32    | gill  | Nano     | 3   | 1    |
| WH105   | gill  | Nano     | 3   | 1    |
| WH 429  | gill  | Nano     | 3   | 0    |
| WH 20   | gill  | Nano     | 3   | 1    |
| WH 26   | kid   | Nano     | 3   | 1    |
| WH21    | kid   | Nano     | 3   | 1    |
| WH 27   | kid   | Nano     | 3   | 1    |
| WH 24   | kid   | Nano     | 3   | 1    |
| WH 22   | kid   | Nano     | 3   | 1    |
| WH 440  | kid   | Nano     | 3   | 1    |
| WH 18   | kid   | Nano     | 3   | 1    |
| WH 19   | kid   | Nano     | 3   | 1    |
| WH 438  | kid   | Nano     | 3   | 1    |
| WH 29   | kid   | Nano     | 3   | 0    |
| WH 23   | kid   | Nano     | 3   | 0    |
| WH 28   | kid   | Nano     | 3   | 1    |

| id      | organ | parasite | rep | pres |
|---------|-------|----------|-----|------|
| WH 425  | kid   | Nano     | 3   | 1    |
| WH 31   | kid   | Nano     | 3   | 1    |
| WH 390  | kid   | Nano     | 3   | 1    |
| WH 381  | kid   | Nano     | 3   | 1    |
| WH 100  | kid   | Nano     | 3   | 1    |
| WH 107  | kid   | Nano     | 3   | 1    |
| WH 96F  | kid   | Nano     | 3   | 1    |
| WH F104 | kid   | Nano     | 3   | 0    |
| WH 25   | kid   | Nano     | 3   | 0    |
| WHF93   | kid   | Nano     | 3   | 1    |
| WH32    | kid   | Nano     | 3   | 1    |
| WH105   | kid   | Nano     | 3   | 1    |
| WH 20   | kid   | Nano     | 3   | 0    |
| WH 26   | hrt   | Nano     | 3   | 1    |
| WH21    | hrt   | Nano     | 3   | 1    |
| WH 24   | hrt   | Nano     | 3   | 0    |
| WH 22   | hrt   | Nano     | 3   | 1    |
| WH 31   | hrt   | Nano     | 3   | 1    |
| WH 390  | hrt   | Nano     | 3   | 1    |
| WH 381  | hrt   | Nano     | 3   | 1    |
| WH 100  | hrt   | Nano     | 3   | 1    |
| WH 107  | hrt   | Nano     | 3   | 1    |
| WH 96F  | hrt   | Nano     | 3   | 1    |
| WH F104 | hrt   | Nano     | 3   | 1    |
| WH 25   | hrt   | Nano     | 3   | 1    |
| WHF93   | hrt   | Nano     | 3   | 1    |
| WH32    | hrt   | Nano     | 3   | 1    |
| WH105   | hrt   | Nano     | 3   | 0    |
| WH 20   | hrt   | Nano     | 3   | 0    |
| WH 26   | kid   | Furn     | 3   | 0    |
| WH21    | kid   | Furn     | 3   | 0    |
| WH 27   | kid   | Furn     | 3   | 0    |
| WH 24   | kid   | Furn     | 3   | 0    |
| WH 22   | kid   | Furn     | 3   | 0    |
| WH 440  | kid   | Furn     | 3   | 0    |
| WH 18   | kid   | Furn     | 3   | 0    |
| WH 19   | kid   | Furn     | 3   | 0    |
| WH 438  | kid   | Furn     | 3   | 0    |
| WH 29   | kid   | Furn     | 3   | 0    |
| WH 23   | kid   | Furn     | 3   | 0    |
| WH 28   | kid   | Furn     | 3   | 0    |
| WH 425  | kid   | Furn     | 3   | 0    |
| WH 31   | kid   | Furn     | 3   | 0    |

| id      | organ | parasite | rep | pres |
|---------|-------|----------|-----|------|
| WH 390  | kid   | Furn     | 3   | 0    |
| WH 381  | kid   | Furn     | 3   | 0    |
| WH 100  | kid   | Furn     | 3   | 0    |
| WH 107  | kid   | Furn     | 3   | 0    |
| WH 96F  | kid   | Furn     | 3   | 0    |
| WH F104 | kid   | Furn     | 3   | 0    |
| WH 25   | kid   | Furn     | 3   | 0    |
| WHF93   | kid   | Furn     | 3   | 0    |
| WH32    | kid   | Furn     | 3   | 0    |
| WH105   | kid   | Furn     | 3   | 0    |
| WH 429  | kid   | Furn     | 3   | 0    |
| WH 20   | kid   | Furn     | 3   | 0    |
| WH 26   | hrt   | Furn     | 3   | 0    |
| WH21    | hrt   | Furn     | 3   | 0    |
| WH 27   | hrt   | Furn     | 3   | 0    |
| WH 24   | hrt   | Furn     | 3   | 0    |
| WH 22   | hrt   | Furn     | 3   | 0    |
| WH 440  | hrt   | Furn     | 3   | 0    |
| WH 18   | hrt   | Furn     | 3   | 0    |
| WH 19   | hrt   | Furn     | 3   | 0    |
| WH 438  | hrt   | Furn     | 3   | 0    |
| WH 29   | hrt   | Furn     | 3   | 0    |
| WH 23   | hrt   | Furn     | 3   | 0    |
| WH 28   | hrt   | Furn     | 3   | 0    |
| WH 425  | hrt   | Furn     | 3   | 0    |
| WH 31   | hrt   | Furn     | 3   | 0    |
| WH 390  | hrt   | Furn     | 3   | 0    |
| WH 381  | hrt   | Furn     | 3   | 0    |
| WH 100  | hrt   | Furn     | 3   | 0    |
| WH 107  | hrt   | Furn     | 3   | 0    |
| WH 96F  | hrt   | Furn     | 3   | 0    |
| WH F104 | hrt   | Furn     | 3   | 0    |
| WH 25   | hrt   | Furn     | 3   | 0    |
| WHF93   | hrt   | Furn     | 3   | 0    |
| WH32    | hrt   | Furn     | 3   | 0    |
| WH105   | hrt   | Furn     | 3   | 0    |
| WH 429  | hrt   | Furn     | 3   | 0    |
| WH 20   | hrt   | Furn     | 3   | 0    |
| WH 26   | spl   | Furn     | 3   | 0    |
| WH21    | spl   | Furn     | 3   | 0    |
| WH 27   | spl   | Furn     | 3   | 0    |
| WH 24   | spl   | Furn     | 3   | 0    |
| WH 22   | spl   | Furn     | 3   | 0    |

| id      | organ | parasite | rep | pres |
|---------|-------|----------|-----|------|
| WH 440  | spl   | Furn     | 3   | 0    |
| WH 18   | spl   | Furn     | 3   | 0    |
| WH 19   | spl   | Furn     | 3   | 0    |
| WH 438  | spl   | Furn     | 3   | 0    |
| WH 29   | spl   | Furn     | 3   | 0    |
| WH 23   | spl   | Furn     | 3   | 0    |
| WH 28   | spl   | Furn     | 3   | 0    |
| WH 425  | spl   | Furn     | 3   | 0    |
| WH 31   | spl   | Furn     | 3   | 0    |
| WH 390  | spl   | Furn     | 3   | 0    |
| WH 381  | spl   | Furn     | 3   | 0    |
| WH 100  | spl   | Furn     | 3   | 0    |
| WH 107  | spl   | Furn     | 3   | 0    |
| WH 96F  | spl   | Furn     | 3   | 0    |
| WH F104 | spl   | Furn     | 3   | 0    |
| WH 25   | spl   | Furn     | 3   | 0    |
| WHF93   | spl   | Furn     | 3   | 0    |
| WH32    | spl   | Furn     | 3   | 0    |
| WH105   | spl   | Furn     | 3   | 0    |
| WH 429  | spl   | Furn     | 3   | 0    |
| WH 20   | spl   | Furn     | 3   | 0    |
| WH 26   | liv   | Furn     | 3   | 0    |
| WH21    | liv   | Furn     | 3   | 0    |
| WH 27   | liv   | Furn     | 3   | 0    |
| WH 24   | liv   | Furn     | 3   | 0    |
| WH 22   | liv   | Furn     | 3   | 0    |
| WH 440  | liv   | Furn     | 3   | 0    |
| WH 18   | liv   | Furn     | 3   | 0    |
| WH 19   | liv   | Furn     | 3   | 0    |
| WH 438  | liv   | Furn     | 3   | 0    |
| WH 29   | liv   | Furn     | 3   | 0    |
| WH 23   | liv   | Furn     | 3   | 0    |
| WH 28   | liv   | Furn     | 3   | 0    |
| WH 425  | liv   | Furn     | 3   | 0    |
| WH 31   | liv   | Furn     | 3   | 0    |
| WH 390  | liv   | Furn     | 3   | 0    |
| WH 381  | liv   | Furn     | 3   | 0    |
| WH 100  | liv   | Furn     | 3   | 0    |
| WH 107  | liv   | Furn     | 3   | 0    |
| WH 96F  | liv   | Furn     | 3   | 0    |
| WH F104 | liv   | Furn     | 3   | 0    |
| WH 25   | liv   | Furn     | 3   | 0    |
| WHF93   | liv   | Furn     | 3   | 0    |

| id      | organ | parasite | rep | pres |
|---------|-------|----------|-----|------|
| WH32    | liv   | Furn     | 3   | 0    |
| WH105   | liv   | Furn     | 3   | 0    |
| WH 429  | liv   | Furn     | 3   | 0    |
| WH 20   | liv   | Furn     | 3   | 0    |
| WH 26   | gill  | Furn     | 3   | 0    |
| WH21    | gill  | Furn     | 3   | 0    |
| WH 27   | gill  | Furn     | 3   | 0    |
| WH 24   | gill  | Furn     | 3   | 0    |
| WH 22   | gill  | Furn     | 3   | 0    |
| WH 440  | gill  | Furn     | 3   | 0    |
| WH 18   | gill  | Furn     | 3   | 0    |
| WH 19   | gill  | Furn     | 3   | 0    |
| WH 438  | gill  | Furn     | 3   | 0    |
| WH 29   | gill  | Furn     | 3   | 0    |
| WH 23   | gill  | Furn     | 3   | 0    |
| WH 28   | gill  | Furn     | 3   | 0    |
| WH 425  | gill  | Furn     | 3   | 0    |
| WH 31   | gill  | Furn     | 3   | 0    |
| WH 390  | gill  | Furn     | 3   | 0    |
| WH 381  | gill  | Furn     | 3   | 0    |
| WH 100  | gill  | Furn     | 3   | 0    |
| WH 107  | gill  | Furn     | 3   | 0    |
| WH 96F  | gill  | Furn     | 3   | 0    |
| WH F104 | gill  | Furn     | 3   | 0    |
| WH 25   | gill  | Furn     | 3   | 0    |
| WHF93   | gill  | Furn     | 3   | 0    |
| WH32    | gill  | Furn     | 3   | 0    |
| WH105   | gill  | Furn     | 3   | 0    |
| WH 429  | gill  | Furn     | 3   | 0    |
| WH 20   | gill  | Furn     | 3   | 0    |

59  
60
